# Supplementary material
Source: HighWire-hosted journal article supplement (https://www.cancerbiomed.org/content/18/3/734)
Supplement: media-1 [file media-1.pdf]

## Supplementary materials

**Table S1** Demographic characteristics of stage I LUAD patients in 3 cohorts

| Characteristics              | GSE31210   | GSE30219  | CICAMS    |
|------------------------------|------------|-----------|-----------|
| Case No.                     | 162        | 81        | 74        |
| Gender, <i>N</i> (%)         |            |           |           |
| Male                         | 69 (42.6)  | 17 (62.7) | 26 (35.1) |
| Female                       | 93 (57.4)  | 64 (37.3) | 48 (64.9) |
| Age, <i>N</i> (%)            |            |           |           |
| < 60                         | 70 (43.2)  | 37 (49.2) | 34 (45.9) |
| ≥ 60                         | 92 (56.8)  | 44 (50.8) | 40 (54.1) |
| Smoking Status, <i>N</i> (%) |            |           |           |
| Never                        | 90 (55.6)  | –         | 56 (75.7) |
| Ever                         | 72 (44.4)  | –         | 18 (24.3) |
| Stage, <i>N</i> (%)          |            |           |           |
| IA                           | 109 (67.3) | 69 (67.8) | 40 (54.1) |
| IB                           | 53 (32.7)  | 12 (32.2) | 34 (45.9) |
| Mutation, <i>N</i> (%)       |            |           |           |
| EGFR mutation                | 100 (61.7) | –         | –         |
| KRAS mutation                | 14 (8.6)   | –         | –         |
| ALK fusion                   | 2 (1.2)    | –         | –         |
| Wild type                    | 46 (28.5)  | –         | –         |

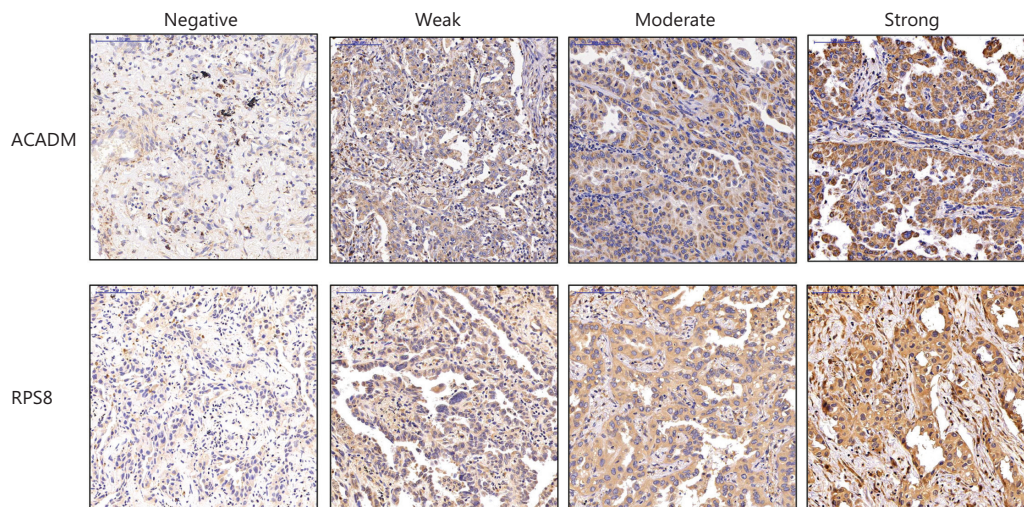

**Figure S1** Representative staining images of ACADM and RPS8 at different levels.

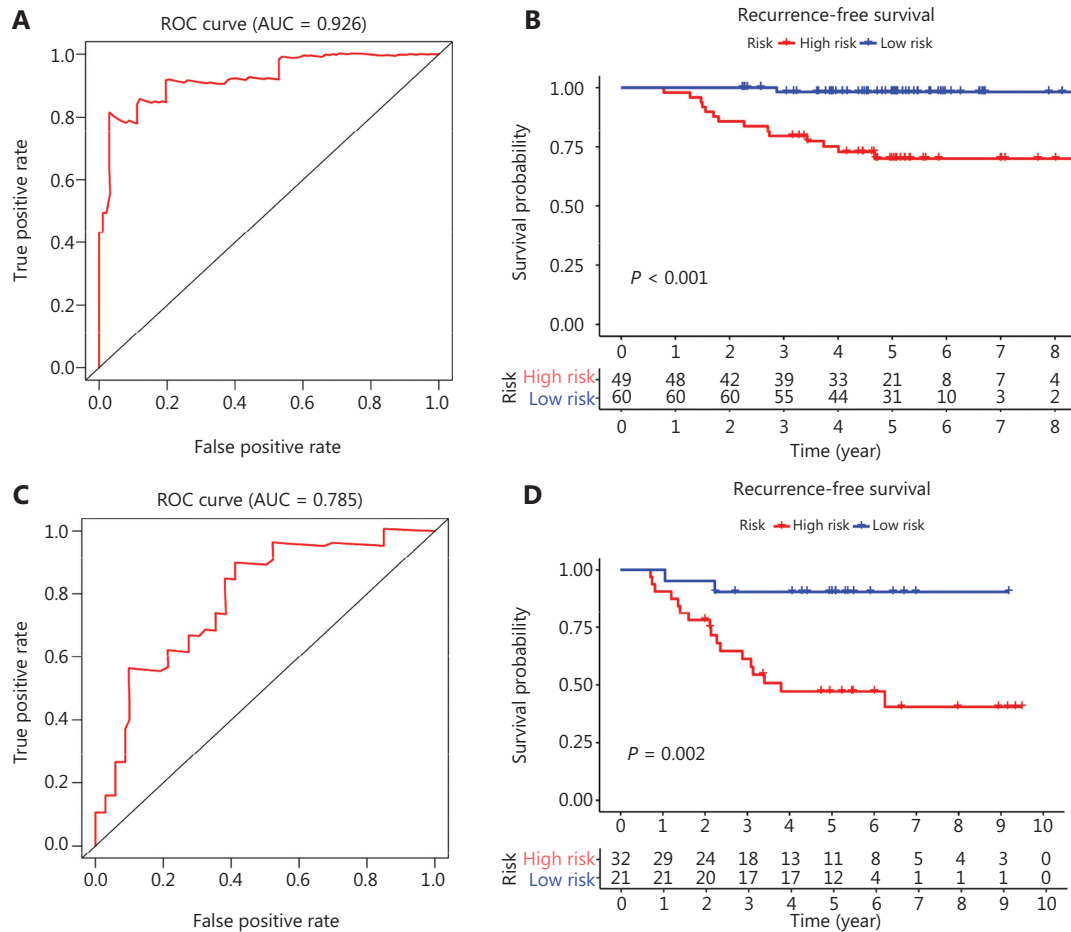

**Figure S2** Stratification analysis of RAMS for its prognostic value in the GSE31210 set. (A) Receiver operating characteristic (ROC) curve analysis of the RAMS for recurrence free survival (RFS) in stage IA LUAD patients. (B) Kaplan-Meier survival curve of RFS for patients with stage IA LUAD based on the RAMS. (C) ROC curve analysis of the RAMS for RFS in stage IB LUAD patients. (D) Kaplan-Meier survival curve of RFS for patients with stage IB LUAD based on the RAMS.

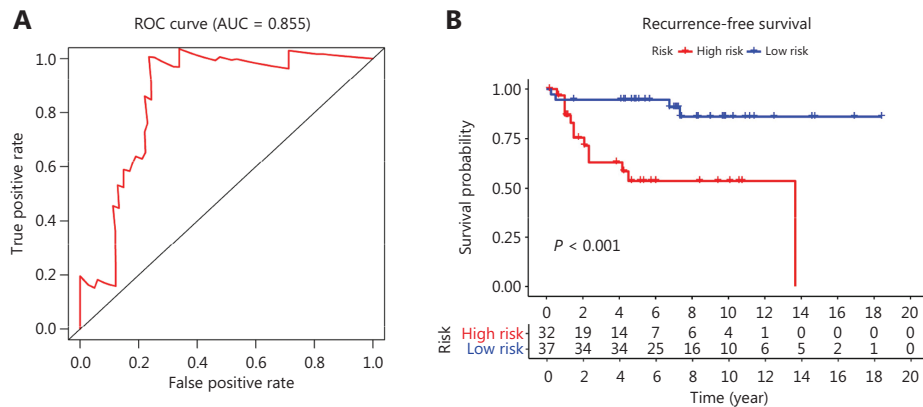

**Figure S3** Stratification analysis of RAMS for its prognostic value in the GSE30219 set. (A) Receiver operating characteristic curve analysis of the RAMS for recurrence free survival (RFS) in stage IA LUAD patients. (B) Kaplan-Meier survival curve of RFS for patients with stage IA LUAD based on the RAMS.

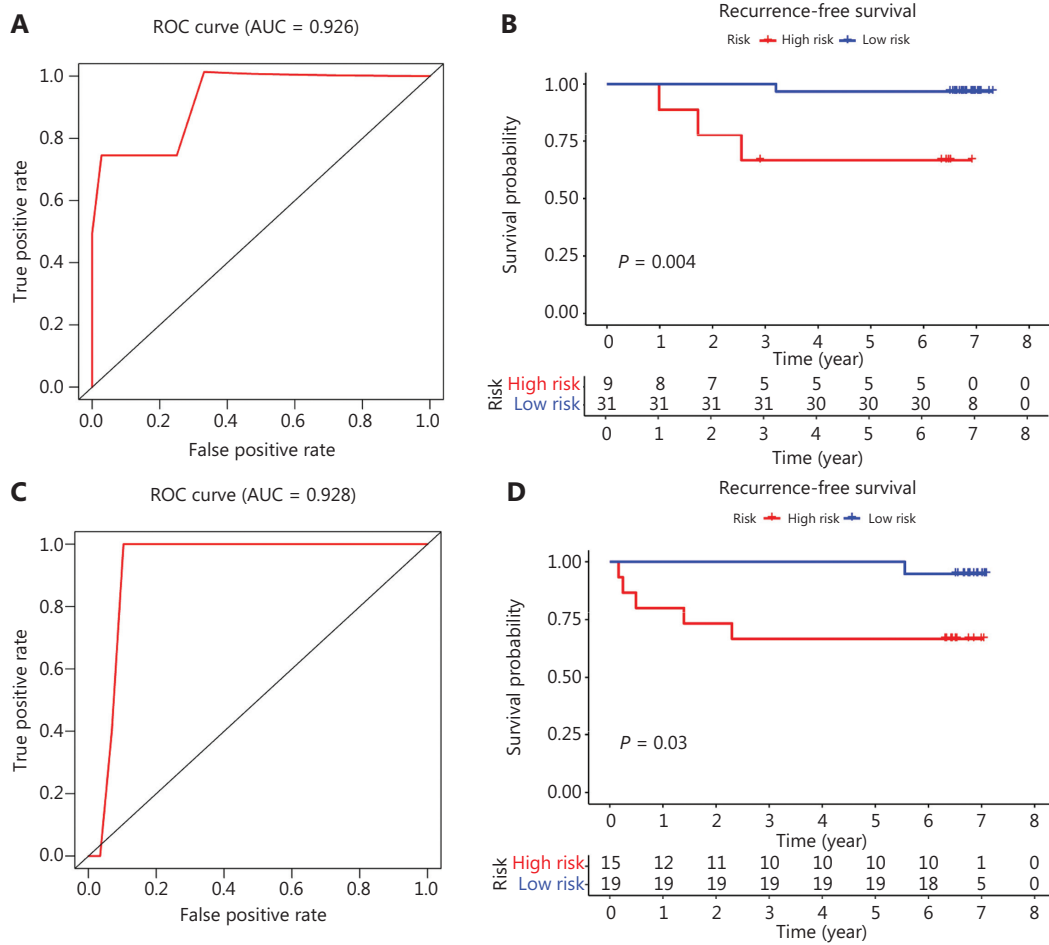

**Figure S4** Stratification analysis of RAMS for its prognostic value in the CICAMS cohort. (A) Receiver operating characteristic (ROC) curve analysis of the RAMS for recurrence free survival (RFS) in stage IA LUAD patients. (B) Kaplan-Meier survival curve of RFS for patients with stage IA LUAD based on the RAMS. (C) ROC curve analysis of the RAMS for RFS in stage IB LUAD patients. (D) Kaplan-Meier survival curve of RFS for patients with stage IB LUAD based on the RAMS.

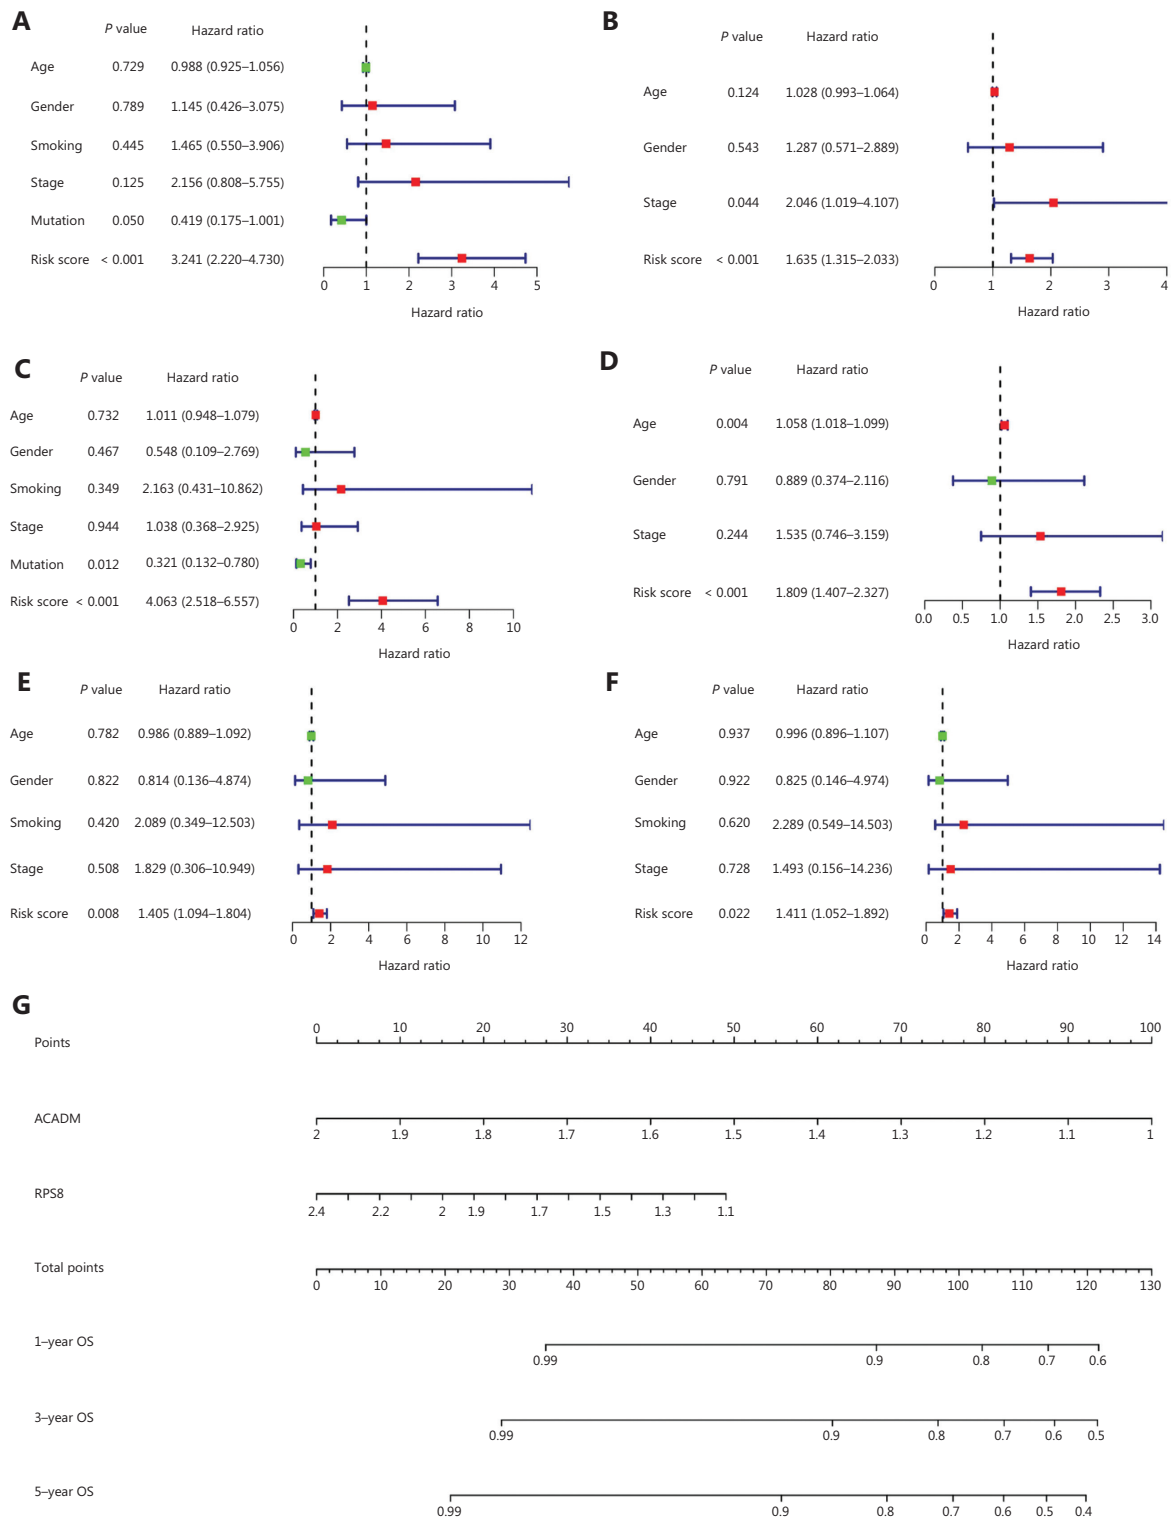

**Figure S5** Univariable and multivariable Cox regression analyses of RAMS and clinical characteristics with overall survival (OS) in 3 cohorts. (A and B) Univariate (A) and multivariate (B) Cox regression analyses of the association between the RAMS and clinical variables regarding predictive value of OS in the GSE31210 set. (C and D) Univariate (C) and multivariate (D) Cox regression analyses of the associations between RAMS and clinical variables for predictive values of OS in the GSE30219 set. (E and F) Univariate (E) and multivariate (F) Cox regression analyses of the associations between RAMS and clinical variables for predictive values of OS in the CICAMS cohort. (G) Nomogram to predict the 1-, 3-, and 5-year OS of patients with stage I LUAD in the CICAMS cohort.
